# Supplementary material
Source: PubMed Central journal article supplement (PMC8250912)
Supplement: ANAE-76-1465-s001.pdf [file ANAE-76-1465-s001.pdf]

**Table S7. Recorded Ventilator Parameters for Varying Inspiratory Pressures in Two Subject Post-Hoc Study**

| <b>Ventilator Parameter</b>   | <b>Pressures (IPAP/EPAP)</b> | <b>C6 Hamilton Ventilator Mean (SD)</b> | <b>V60 Phillips Ventilator Mean (SD)</b> |
|-------------------------------|------------------------------|-----------------------------------------|------------------------------------------|
| Tidal Volume (Litres)         | 5/5                          | 1.5 (0.5)                               | 1.2 (0.1)                                |
|                               | 10/10                        | 1.6 (0.5)                               | 1.5 (0.2)                                |
|                               | 15/10                        | 2.0 (0.4)                               | 1.7 (0.2)                                |
|                               | 20/10                        | 2.4 (0.4)                               | 1.7 (0.1)                                |
|                               | 25/10                        | 2.9 (0.6)                               | 2.2 (0.2)                                |
|                               | 20/10 EXE                    | 2.8 (0.5)                               | 2.3 (0.5)                                |
|                               | Overall, mean (SD)           | 2.2 (0.7)                               | 1.8 (0.5)                                |
|                               | Difference in mean (%)       | 24.6 (p<0.001)                          |                                          |
| Respiratory Rate (BPM)        | 5/5                          | 16 (3.5)                                | 13.0 (1.8)                               |
|                               | 10/10                        | 15.3 (3.6)                              | 12.2 (1.5)                               |
|                               | 15/10                        | 14.2 (2.3)                              | 13.0 (5.7)                               |
|                               | 20/10                        | 17.2 (5.8)                              | 14.7 (2.3)                               |
|                               | 25/10                        | 13.7 (1.5)                              | 10.7 (3.8)                               |
|                               | 20/10 EXE                    | 16.5 (1.4)                              | 18.8 (2.9)                               |
|                               | Overall, mean (SD)           | 15.5 (3.4)                              | 13.7 (4.0)                               |
|                               | Difference in mean (%)       | 13.1 (p=0.03)                           |                                          |
| Peak Inspiratory (Flow L/min) | 5/5                          | 73.7 (14.3)                             | 52.4 (5.8)                               |
|                               | 10/10                        | 82.9 (31.8)                             | 73.2 (4.6)                               |
|                               | 15/10                        | 94.8 (28.9)                             | 113.6 (10.2)                             |
|                               | 20/10                        | 133.2 (33.2)                            | 147.1 (10.4)                             |
|                               | 25/10                        | 174.3 (17.8)                            | 175.4 (9.4)                              |
|                               | 20/10 EXE                    | 179.7 (8.9)                             | 187.7 (26.0)                             |
|                               | Overall, mean (SD)           | 123.1 (48.6)                            | 124.9 (52.2)                             |
|                               | Difference in mean (%)       | -1.4 (p=0.71)                           |                                          |
| Peak Expiratory (Flow L/min)  | 5/5                          | 34.4 (10.8)                             | 33.4 (5.4)                               |
|                               | 10/10                        | 31.6 (5.7)                              | 40.5 (8.6)                               |
|                               | 15/10                        | 40.3 (7.6)                              | 50.1 (11.5)                              |
|                               | 20/10                        | 59.1 (10.4)                             | 60.3 (10.7)                              |
|                               | 25/10                        | 67.4 (13.6)                             | 73.0 (16.2)                              |
|                               | 20/10 EXE                    | 99.7 (16.8)                             | 101.0 (18.5)                             |
|                               | Overall, mean (SD)           | 55.4 (26.2)                             | 59.7 (25.6)                              |
|                               | Difference in mean (%)       | -7.2 (p=0.04)                           |                                          |
| Minute Volume (L/min)         | 5/5                          | 23.2 (4.4)                              | 15.4 (0.9)                               |
|                               | 10/10                        | 23.6 (6.6)                              | 18.1 (3.2)                               |
|                               | 15/10                        | 28.6 (7.5)                              | 22.0 (8.8)                               |
|                               | 20/10                        | 39.7 (8.4)                              | 25.5 (3.3)                               |
|                               | 25/10                        | 38.9 (5.9)                              | 23.1 (9.3)                               |
|                               | 20/10 EXE                    | 46.0 (9.6)                              | 43.1 (3.1)                               |
|                               | Overall, mean (SD)           | 33.3 (11.1)                             | 24.5 (10.5)                              |
|                               | Difference in mean (%)       | 36.0 (p<0.001)                          |                                          |

|                         |                    |             |            |
|-------------------------|--------------------|-------------|------------|
|                         |                    |             |            |
| MV Leak †<br>(L/min)    | 5/5                | 1.8 (0.7)   |            |
|                         | 10/10              | 2.2 (0.7)   |            |
|                         | 15/10              | 1.6 (1.8)   |            |
|                         | 20/10              | 3.3 (1.4)   |            |
|                         | 25/10              | 2.2 (2.0)   |            |
|                         | 20/10 EXE          | 1.0 (0.3)   |            |
|                         | Overall, mean (SD) | 2.0 (1.4)   |            |
|                         |                    |             |            |
| Total Leak §<br>(L/min) | 5/5                |             | 20.2 (3.8) |
|                         | 10/10              |             | 25.5 (2.4) |
|                         | 15/10              |             | 24.0 (2.5) |
|                         | 20/10              |             | 24.0 (6.2) |
|                         | 25/10              |             | 26.5 (7.7) |
|                         | 20/10 EXE          |             | 30.5 (9.1) |
|                         | Overall, mean (SD) |             | 25.1 (6.3) |
|                         |                    |             |            |
| ASI (%) †               | Overall, mean (SD) | 29.8 (18.9) | 1.0 (2.4)  |
