# Supplementary material
Source: PubMed Central journal article supplement (PMC8250912)
Supplement: ANAE-76-1465-s002.pdf [file ANAE-76-1465-s002.pdf]

**Table S6. Physiological Data during Exercise whilst Receiving Non-Invasive Positive Pressure Ventilation**

| <b>Physiological Parameter</b> | <b>C6 Hamilton Ventilator<br/>Mean (SD)</b> | <b>V60 Phillips Ventilator<br/>Mean (SD)</b> |
|--------------------------------|---------------------------------------------|----------------------------------------------|
| Minute Volume (L/min)          | 29.50 (5.51)                                | 33.21 (10.29)                                |
| Tidal Volume (Litres)          | 1.34 (0.40)                                 | 1.49 (0.40)                                  |
| Respiratory Rate (BPM*)        | 22.14 (6.07)                                | 22.13 (5.51)                                 |
| Heart Rate (BPM)               | 119.00 (14.43)                              | 117.50 (15.64)                               |
