# Supplementary material
Source: PubMed Central journal article supplement (PMC8250912)
Supplement: ANAE-76-1465-s003.pdf [file ANAE-76-1465-s003.pdf]

Table S2. Particle Size to Volume Conversion Table.

| Lower diam | Upper diam | Av $\mu\text{m}^3$ |
|------------|------------|--------------------|
| 0.50       | 0.70       | 0.116              |
| 0.70       | 1.00       | 0.331              |
| 1.00       | 3.00       | 5.192              |
| 3.00       | 5.00       | 35.505             |
| 5.00       | 10.00      | 244.348            |
| 10.0       | 25.00      | 3,299.515          |
