# Supplementary material
Source: PubMed Central journal article supplement (PMC8250912)
Supplement: ANAE-76-1465-s004.pdf [file ANAE-76-1465-s004.pdf]

Table S4 Temperature and Relative Humidity.

| Activity  | Temperature (°C) |            | Relative Humidity (%) |           |
|-----------|------------------|------------|-----------------------|-----------|
|           | Mean (SD)        | Range      | Mean (SD)             | Range     |
| Ambient   | 23.5 (1.6)       | 21.0 -26.0 | 37.5 (5.9)            | 26.0-46.0 |
| No device | 26.8 (1.7)       | 22.3-28.2  | 37.1 (8.4)            | 28.0-52.0 |
| HFNO      | 27.7 (1.3)       | 26.0 -29.5 | 36.0 (5.1)            | 30.0-46.0 |
| NIPPV-D   | 28.1 (1.7)       | 24.3-29.6  | 34.2 (4.6)            | 28.0-42.0 |
| NIPPV-S   | 27.8 (2.3)       | 22.9-29.5  | 35.1 (3.9)            | 29.0-40.0 |
