# Supplementary material
Source: PubMed Central journal article supplement (PMC8250912)
Supplement: ANAE-76-1465-s007.pdf [file ANAE-76-1465-s007.pdf]

Table S1. Design of Study

|               | Quiet breathing | Exercise | Cough  | Forced Expiration | Talk | Shout |
|---------------|-----------------|----------|--------|-------------------|------|-------|
| No device     | ✓               | ✓        | ✓      | ✓                 | ✓    | ✓     |
| Surgical mask | ✓               | ✓        | ✓      | ✓                 | ✓    | ✓     |
| HFNO*         | ✓ 20, 40, 60    | ✓ 60     | ✓ 60   | ✓ 60              | ✓ 60 | ✗     |
| NIPPV†        | ✓ 5/5 to 25/10  | ✓ 20/10  | Single | ✗                 | ✗    | ✗     |
|               |                 |          | Dual   | ✗                 | ✗    | ✗     |
