# Supplementary material
Source: PubMed Central journal article supplement (PMC8250912)
Supplement: ANAE-76-1465-s008.pdf [file ANAE-76-1465-s008.pdf]

Table S3 Subject Baseline Characteristic Data.

| Characteristic           | Mean (SD)    |
|--------------------------|--------------|
| Age (years)              | 29 (2.83)    |
| Height (cm)              | 170.4 (6.88) |
| Weight (kg)              | 71.4 (8.88)  |
| BMI (Kg/m <sup>2</sup> ) | 24.51 (1.75) |
| Resting HR (BPM*)        | 63.7 (8.2)   |
| Resting RR (PBM)         | 11.77 (2.28) |
| FEV1 (litres)            | 3.99 (0.41)  |
| FVC (litres)             | 4.84 (0.48)  |
| FEV1/FVC (litres)        | 82.85 (3.53) |
