# Supplementary material
Source: PubMed Central journal article supplement (PMC8250912)
Supplement: ANAE-76-1465-s011.pdf [file ANAE-76-1465-s011.pdf]

**Table S5 The Distribution of Particle Number and Total Sum of Particle Volumes.**

| <b>Activity or Therapy</b> | <b>Sum of all particle counts</b> | <b>Percent of particles &lt;5µm</b> | <b>Volume of all particles (µm<sup>3</sup>)</b> | <b>Percent of volume in particles &lt;5µm</b> |
|----------------------------|-----------------------------------|-------------------------------------|-------------------------------------------------|-----------------------------------------------|
| Quiet breathing            | 140                               | 97.46                               | 3,737                                           | 15.20                                         |
| Talk                       | 5,317                             | 98.69                               | 88,039                                          | 22.13                                         |
| Exercise                   | 5,591                             | 94.76                               | 336,888                                         | 5.94                                          |
| Shout                      | 29,970                            | 98.86                               | 393,108                                         | 21.69                                         |
| FEV                        | 68,447                            | 98.15                               | 826,651                                         | 14.53                                         |
| Cough                      | 140,370                           | 99.50                               | 653,972                                         | 34.89                                         |
| HFNO BR 20                 | 122                               | 94.51                               | 9,749                                           | 8.83                                          |
| HFNO BR 40                 | 259                               | 96.22                               | 12,089                                          | 7.13                                          |
| HFNO BR 60                 | 609                               | 97.15                               | 8,187                                           | 22.41                                         |
| NIPPV-S BR 5/5             | 187                               | 96.46                               | 8,778                                           | 17.07                                         |
| NIPPV-S BR 10/10           | 252                               | 98.10                               | 4,058                                           | 21.19                                         |
| NIPPV-S BR 15/10           | 306                               | 97.16                               | 10,016                                          | 20.92                                         |
| NIPPV-S BR 20/10           | 368                               | 97.63                               | 11,511                                          | 19.95                                         |
| NIPPV-S BR 25/10           | 376                               | 98.26                               | 9,827                                           | 15.59                                         |
| NIPPV-D BR 5/5             | 230                               | 95.07                               | 9,694                                           | 12.45                                         |
| NIPPV-D BR 10/10           | 313                               | 94.01                               | 20,314                                          | 7.79                                          |
| NIPPV-D BR 15/10           | 385                               | 96.02                               | 19,928                                          | 9.68                                          |
| NIPPV-D BR 20/10           | 554                               | 94.43                               | 37,903                                          | 6.39                                          |
| NIPPV-D BR 25/10           | 875                               | 94.55                               | 74,115                                          | 6.45                                          |
| NIPPV-S EXE 20/10          | 2,115                             | 95.42                               | 134,194                                         | 5.72                                          |
| NIPPV-D EXE 20/10          | 3,119                             | 92.39                               | 374,125                                         | 5.46                                          |
| HFNO Talk 60               | 5,358                             | 97.68                               | 144,974                                         | 21.49                                         |
| HFNO EXE 60                | 3,495                             | 94.52                               | 245,883                                         | 6.45                                          |
| HFNO FEV 60 (n=10)         | 276,682                           | 97.94                               | 1,981,211                                       | 16.34                                         |
| HFNO FEV 60 (n=9)          | 36,175                            | 95.31                               | 348,345                                         | 9.91                                          |
| HFNO Cough 60              | 40,505                            | 99.23                               | 402,607                                         | 22.44                                         |
| Breath, mask               | 120                               | 96.98                               | 5,955                                           | 15.46                                         |
| Talk, mask                 | 2,770                             | 98.56                               | 63,056                                          | 22.44                                         |
| Exercise, mask             | 3,581                             | 94.17                               | 272,758                                         | 7.50                                          |
| Shout, mask                | 10,202                            | 98.62                               | 180,760                                         | 18.31                                         |
| FEV, mask                  | 5,119                             | 92.51                               | 541,382                                         | 3.28                                          |
| Cough, mask                | 13,174                            | 97.04                               | 313,536                                         | 5.59                                          |
