# Supplementary material
Source: PubMed Central journal article supplement (PMC8250912)
Supplement: ANAE-76-1465-s012.pdf [file ANAE-76-1465-s012.pdf]

**Table S8. Fold Difference in Particle Counts when Compared to Breathing Alone across all Subjects and when the Highest is Removed**

| <b>Fold Change Compared to Breath</b> | <b>All Subjects (N=10)</b> | <b>Highest Removed (N=9)</b> |
|---------------------------------------|----------------------------|------------------------------|
| Talk                                  | 34.63                      | 31.12                        |
| Exercise                              | 58.01                      | 55.77                        |
| Shout                                 | 163.64                     | 147.26                       |
| FEV                                   | 227.58                     | 164.69                       |
| Cough                                 | 370.76                     | 323.81                       |
| <b>HFNC</b>                           |                            |                              |
| HFNC BR 20                            | 1.27                       | 1.33                         |
| HFNC BR 40                            | 1.73                       | 1.67                         |
| HFNC BR 60                            | 2.30                       | 1.94                         |
| <b>HFNO</b>                           |                            |                              |
| HFNO TLK 60                           | 32.26                      | 27.35                        |
| HFNO EXE 60                           | 39.49                      | 36.97                        |
| HFNO FEV 60                           | 156.58                     | 90.14                        |
| HFNO CHG 60                           | 182.80                     | 174.18                       |
| <b>NIPPV-D</b>                        |                            |                              |
| NIPPV-D BR 5/5                        | 1.86                       | 2.00                         |
| NIPPV-D BR 10/10                      | 2.87                       | 2.64                         |
| NIPPV-D BR 15/10                      | 3.06                       | 3.04                         |
| NIPPV-D BR 20/10                      | 4.57                       | 4.71                         |
| NIPPV-D BR 25/10                      | 7.77                       | 7.01                         |
| <b>NIPPV-S</b>                        |                            |                              |
| NIPPV-S BR 5/5                        | 1.49                       | 1.31                         |
| NIPPV-S BR 10/10                      | 1.35                       | 1.37                         |
| NIPPV-S BR 15/10                      | 2.14                       | 2.15                         |
| NIPPV-S BR 20/10                      | 2.43                       | 2.26                         |
| NIPPV-S BR 25/10                      | 2.64                       | 2.37                         |
| <b>NIPPV-D EXE</b>                    |                            |                              |
| NIPPV-D EXE 20/10                     | 39.47                      | 40.23                        |
| <b>NIPPV-S EXE</b>                    |                            |                              |
| NIPPV-S EXE 20/10                     | 20.64                      | 20.36                        |
