# Supplementary material
Source: PubMed Central journal article supplement (PMC8250912)
Supplement: ANAE-76-1465-s013.pdf [file ANAE-76-1465-s013.pdf]

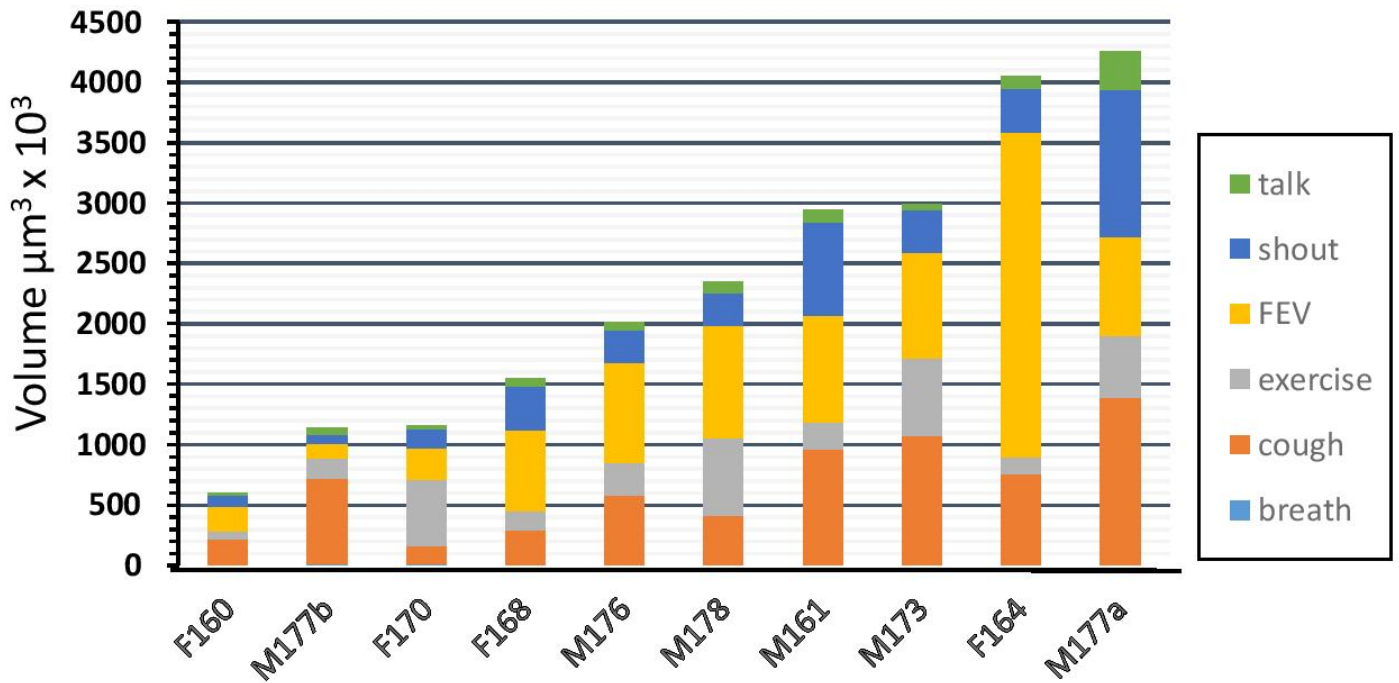

**Figure S2** Total volumes of particles generated by six different activities by each subject. Subjects are described by sex (male/female) and height (cm). Two subjects were male and 177 cm in height. Volumes estimated using a simple model applied to the six size-bins of particle counts 0.5 to 25  $\mu\text{m}$ . Quiet breathing contributes < 0.2% of total volume on average and is barely discernible.
